# Supplementary material for: Recurrent neurogenic shock as a rare postoperative complication associated with pancreaticoduodenectomy with mesopancreas excision in elderly patient: a case report
Source: PubMed Central journal article supplement — Gland Surg. 2024 Nov 26;13(11):2206–11. doi: 10.21037/gs-23-494 (PMC11635555; doi:10.21037/gs-23-494), 2024-11-26
Supplement: gs-13-11-2206-rc.pdf [file gs-13-11-2206-rc.pdf]

| Topic                            | Item No | Checklist item description                                                                                                                                                     | Reported on Page Number/Line Number | Reported on Section/Paragraph       |
|----------------------------------|---------|--------------------------------------------------------------------------------------------------------------------------------------------------------------------------------|-------------------------------------|-------------------------------------|
| Title                            | 1       | The diagnosis or intervention of primary focus followed by the words "case report"                                                                                             | 1/1-2                               | Cover Page                          |
| Key Words                        | 2       | 2 to 5 key words that identify diagnoses or interventions in this case report, including "case report"                                                                         | 3/65                                | Key Words                           |
| Abstract<br>(Structured summary) | 3a      | Background: state what is known and unknown; why the case report is unique and what it adds to existing literature.                                                            | 2/ 48-55                            | Abstract                            |
|                                  | 3b      | Case Description: describe the patient's demographic details, main symptoms, history, important clinical findings, the main diagnosis, interventions, outcomes and follow-ups. | 2/ 48-58 ; 59-63                    | Abstract                            |
|                                  | 3c      | Conclusions: summarize the main take-away lesson, clinical impact and potential implications.                                                                                  | 3/ 53-59                            | Abstract                            |
| Introduction                     | 4       | One or two paragraphs summarizing why this case is unique (may include references)                                                                                             | 4/ 99-104                           | Introduction                        |
| Patient Information              | 5a      | De-identified patient specific information                                                                                                                                     | 4/ 107-111                          | Case Presentation/<br>Paragraph 1   |
|                                  | 5b      | Primary concerns and symptoms of the patient                                                                                                                                   | 4/ 110-114                          | Case<br>Presentation/Paragraph<br>1 |
|                                  | 5c      | Medical, family, and psycho-social history including relevant genetic information                                                                                              | 3/81-82 ; 4/83-94                   | Case Presentation/<br>Paragraph 1   |
|                                  | 5d      | Relevant past interventions with outcomes                                                                                                                                      | 4/94-96                             | Case Presentation/<br>Paragraph 1   |

|                          |    |                                                                                            |             |                                         |
|--------------------------|----|--------------------------------------------------------------------------------------------|-------------|-----------------------------------------|
| Clinical Findings        | 6  | Describe significant physical examination (PE) and important clinical findings             | 4/96-98     | Case Presentation/<br>Paragraph 1       |
| Timeline                 | 7  | Historical and current information from this episode of care organized as a timeline       | 4/99-106    | Case Presentation/<br>Paragraph 1       |
| Diagnostic Assessment    | 8a | Diagnostic testing (such as PE, laboratory testing, imaging, surveys).                     | 4/106-112   | Case Presentation/<br>Paragraph 1       |
|                          | 8b | Diagnostic challenges (such as access to testing, financial, or cultural)                  | 4 / 106-109 | Case Presentation/<br>Paragraph 1       |
|                          | 8c | Diagnosis (including other diagnoses considered)                                           | 4/ 106-109  | Case Presentation/<br>Paragraph 1       |
|                          | 8d | Prognosis (such as staging in oncology) where applicable                                   | 5 / 117-120 | Case Presentation/<br>Paragraph 3       |
| Therapeutic Intervention | 9a | Types of therapeutic intervention (such as pharmacologic, surgical, preventive, self-care) | 5 / 113-114 | Case Presentation/<br>Paragraph 1 and 2 |
|                          | 9b | Administration of therapeutic intervention (such as dosage, strength, duration)            | 5 / 113-114 | Case Presentation/<br>Paragraph 1 and 2 |
|                          | 9c | Changes in therapeutic intervention (with rationale)                                       | 5 / 114-117 | Case Presentation/<br>Paragraph 1 and 2 |

2-1

|                        |     |                                                        |             |                                         |
|------------------------|-----|--------------------------------------------------------|-------------|-----------------------------------------|
| Follow-up and Outcomes | 10a | Clinician and patient-assessed outcomes (if available) | 4 / 118-120 | Case Presentation/<br>Paragraph 3       |
|                        | 10b | Important follow-up diagnostic and other test results  | 4 / 118-120 | Case Presentation/<br>Paragraph 1 and 3 |

|                     |     |                                                                                                        |                                         |                                         |
|---------------------|-----|--------------------------------------------------------------------------------------------------------|-----------------------------------------|-----------------------------------------|
|                     | 10c | Intervention adherence and tolerability (How was this assessed?)                                       | 4 / 114-117                             | Case Presentation/<br>Paragraph 2 abd 3 |
|                     | 10d | Adverse and unanticipated events                                                                       | 5 / 118-120                             | Case Presentation/<br>Paragraph         |
| Discussion          | 11a | A scientific discussion of the strengths AND limitations associated with this case report              | 6 / 151 -153                            | Discussion/ Paragraph<br>2              |
|                     | 11b | Discussion of the relevant medical literature with references                                          | 5 / 122-131                             | Discussion/ Paragraph<br>2, 3 and 4     |
|                     | 11c | The scientific rationale for any conclusions (including assessment of possible causes)                 | 5/ 132-141; 6/142-150                   | Discussion /<br>Paragraph<br>1, 3 and 4 |
|                     | 11d | The primary "take-away" lessons of this case report (without references) in a one paragraph conclusion | 6 / 151-158                             | Discussion/ Paragraph                   |
|                     |     |                                                                                                        |                                         | 5                                       |
| Patient Perspective | 12  | The patient should share their perspective in one to two paragraphs on the treatment(s) they received  | Not included                            | Not included                            |
| Informed Consent    | 13  | Did the patient give informed consent? Please provide if requested                                     | Yes <input checked="" type="checkbox"/> | No                                      |

2-2Updated on January 26, 2022

Article information: <https://dx.doi.org/10.21037/gc-23-494>

\*As the checklist was provided upon initial submission, the page number/line number reported may be changed due to copyediting and may not be referable in the published version. In this case, the section/paragraph may be used as an alternative reference.
